# Supplementary material
Source: PubMed Central journal article supplement (PMC7729584)
Supplement: jamaoncol-e206178-s001.pdf [file jamaoncol-e206178-s001.pdf]

## Supplementary Online Content

Wang QQ, Berger NA, Xu R. Analyses of risk, racial disparity, and outcomes among US patients with cancer and COVID-19 Infection. *JAMA Oncol*. Published online December 10, 2020. doi:10.1001/jamaoncol.2020.6178

**eFigure.** COVID-19 Risk Disparity Among Patients With Recent Diagnosis of Cancer (Before Adjusting for Known COVID-19 Risk Factors)

This supplementary material has been provided by the authors to give readers additional information about their work.

**eFigure.** COVID-19 Risk Disparity Among Patients With Recent Diagnosis of Cancer (Before Adjusting for Known COVID-19 Risk Factors)

**COVID-19 risk disparity among patients with recent diagnosis of cancer  
(before adjusting for known COVID-19 risk factors)**

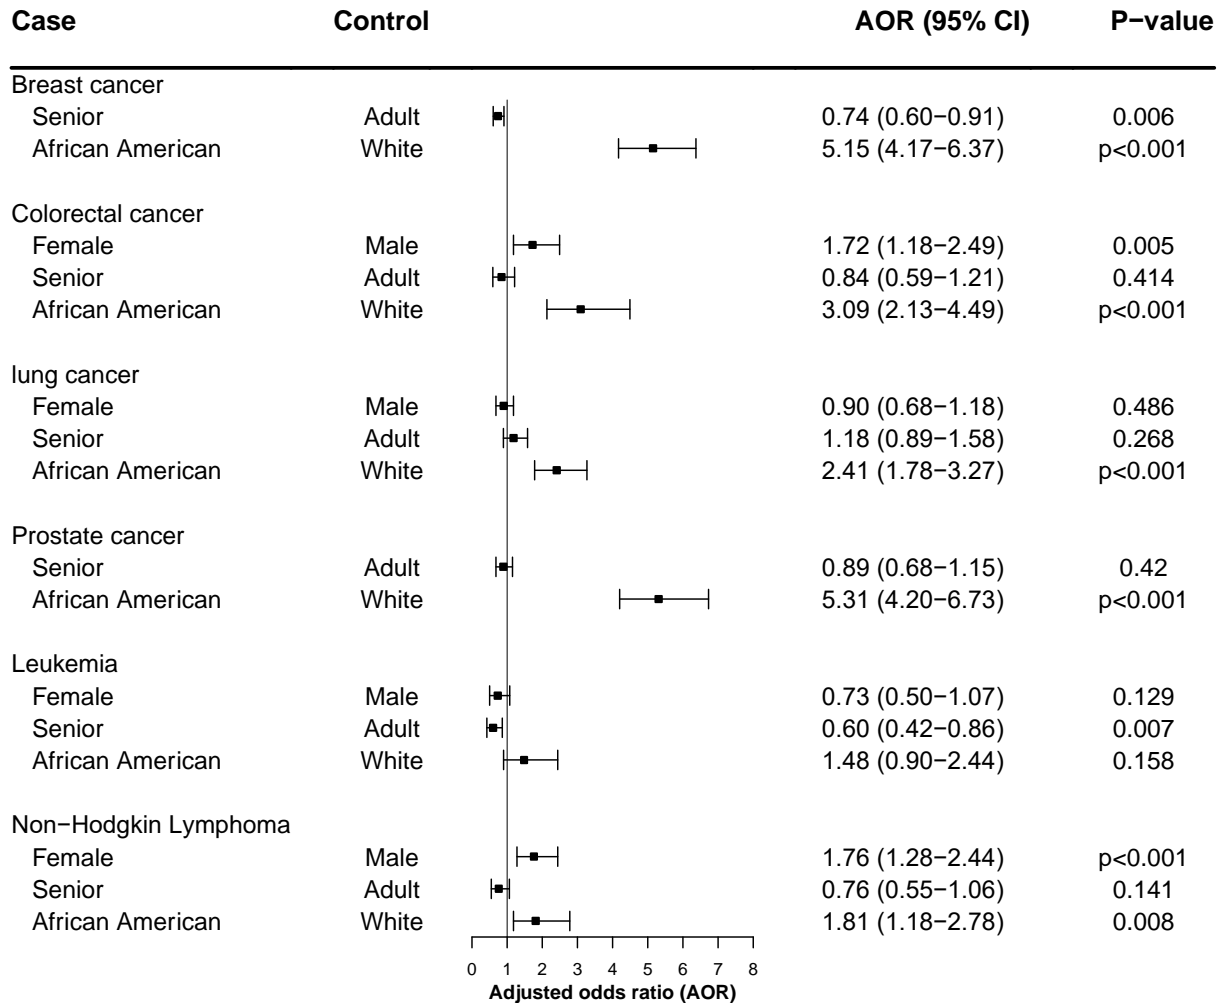

Effects of demographics on odds of COVID-19 infection among patients with recent cancer (diagnosis made within the last year), without adjusting for COVID-19 risk factors including asthma, cardiovascular diseases, type 2 diabetes, obesity, chronic kidney diseases, chronic obstructive pulmonary disease, cancer treatments (chemotherapy, radiotherapy, immunotherapy), transplants (bone marrow, solid organ), and nursing home stay.
